# Supplementary material for: Bio-Interventional Uveoscleral Outflow Enhancement for Intraocular Pressure Reduction in Open-Angle Glaucoma: One-Year Results of a Multicenter Prospective Real-world Evidence Study
Source: Research Square preprint supplement (doi:10.21203/rs.3.rs-7216948/v1), 2025-07-29
Supplement: Supplementary file 1 [file 0c52486082a275660246421d.docx]

*Table 3. Post-surgical Safety*

| **SAFETY 12M, n41** |  |
| --- | --- |
|  |  |
| CME | 0% |
| IOP <6 mmHg, transient | 4.9% |
| High IOP 10mmHg over baseline | 17.1% |
| <30 days | 9.8% |
| 30-90 days | 0% |
| 90+ days | 7.3% |
|  |  |
| BCVA loss ≥ 2 lines (transient, resolved) | 0.0% |
| Corneal edema | 0.0% |
| Corneal Abrasion, unrelated to procedure | 0.8% |
| Hyphema, post-operative | 4.9% |
|  |  |
| **Non-incisional Procedures** |  |
| SLT | 9.8% |
| Yag synechiolysis | 2.4% |
| Ciliary body ablation | 2.4% |
| **Incisional** |  |
| Trabeculectomy | 2.4% |
| Tube shunt | 2.4% |
| Goniotomy | 2.4% |
