# Supplementary material for: Bio-Interventional Uveoscleral Outflow Enhancement for Intraocular Pressure Reduction in Open-Angle Glaucoma: One-Year Results of a Multicenter Prospective Real-world Evidence Study
Source: Research Square preprint supplement (doi:10.21203/rs.3.rs-7216948/v1), 2025-07-29
Supplement: Supplementary file 2 [file 3e6322972c23a4fb57c01acd.docx]

*Table 1. Baseline Demographics*

| **BASELINE DEMOGRAPHICS** |  |
| --- | --- |
| Patients | 38 |
| Patients with bilateral implantation | 3 |
| Eyes | 41 |
| Sex, % female | 44.7% |
| Age, mean | 71.4 ± 10.5 |
| Race, n (%) |  |
| Asian | 1 (3%) |
| Black or African American | 5 (13%) |
| White | 32 (84%) |
| Ethnicity, n (%) |  |
| Hispanic or Latino | 13 (34%) |
| Glaucoma Diagnosis, n (%) |  |
| POAG | 36 (95%) |
| Pigmentary | 1 (3%) |
| Pseudoexfoliative | 1 (3%) |
| Primary Optic Atrophy | 1 (3%) |
| Other OAG | 2 (6%) |
| Prior Surgical Intervention |  |
| Prior Trabecular MIGS | 15 (37%) |
| Prior SLT | 15 (37%) |
| Prior Cataract Surgery/Pseudophakic | 28 (68%) |
| Prior Glaucoma Surgery (Tube, Trab, Xen, CPC) | 11 (27%) |
| Baseline MD | -6.8± 5.2 |
| Baseline medicated IOP, Mean (mmHg) | 21.6 ± 5.0 |
| Baseline IOP lowering medications, mean | 2.8 ± 1.3 |
| % refractory (failed MTMT or incisional surgery, uncontrolled IOP) | 27 (66%) |
