# Supplementary material for: Bio-Interventional Uveoscleral Outflow Enhancement for Intraocular Pressure Reduction in Open-Angle Glaucoma: One-Year Results of a Multicenter Prospective Real-world Evidence Study
Source: Research Square preprint supplement (doi:10.21203/rs.3.rs-7216948/v1), 2025-07-29
Supplement: Supplementary file 3 [file fcde6c5f233689f1e394133a.docx]

*Table 2. Post-surgical Efficacy Outcomes*

| **OUTCOMES 12M** |  |
| --- | --- |
| Preop IOP, mean (SD, n) n=41 | 21.6 (5.1) |
| 1M IOP, mean (SD, n) n=39 | 15.6 (8.4) |
|  |  |
| 6M IOP, mean (SD, n) n=32 | 16.8 (8.5) |
| Final 12M IOP, mean (SD, n) n=31 | 14.7 (5.4) |
| Final 12M IOP, SEM | 1.0 |
| Change, mean | -6.7 (6.1) |
| % change in IOP | -31% |
| >20% IOP reduction, % | 71.0% |
| *Medication Outcomes* |  |
| Preop Mean, (SD) | 2.8 (1.3) |
| 1M IOP, mean (SD, n) | 1.7 (1.6) |
| 6M IOP, mean (SD, n) | 1.9 (1.5) |
| Final 12 Mean (SD) | 1.9 (1.6) |
| Change, mean (SD) | -1.0 (1.2) |
| No. of Medications at 12 months, n (%) |  |
| 0 | 22.6% |
| 1 | 29.0% |
| 2 | 25.8% |
| 3+ | 35.5% |
|  |  |
| RESPONDER ANALYSIS |  |
| *Qualified Success, n (%) (secondary incisional surgery = failure, no increase in meds)* | CREST C2 ALL |
| IOP ≤ 15 mmHg, % | 53% |
| IOP ≤ 18 mmHg, % | 62% |
| IOP ≤ 21 mmHg, % | 79% |
| ≥ 20% reduction in IOP and no increase in meds, % | 53% |
| ≥ 20% reduction in IOP and no increase in meds in eyes with BL IOP >=16, % | 66% |
